# Supplementary material for: Inducible secreting TLR5 agonist CBLB502 enhances antitumor activity of CAR133-NK92 cells for colorectal cancer
Source: Research Square preprint supplement (doi:10.21203/rs.3.rs-1227221/v1), 2022-01-18
Supplement: Supplementary file 1 [file 64b2d95b7db6c9be1e131c35.docx]

**Supplemental file 1**

**Table S1: Primer sequences used in this study**

| **Genes** | **Forward primer (5′-3′)** | **Reverse primer (5′-3′)** |
| --- | --- | --- |
| CD137 | TCCGCAGATCATCTCCTTCT | AGTTTCTTTCTGCCCCGTTT |
| CD69 | AGTTCCTGTCCTGTGTGCTG | TAGCCAACCCAGTCCTCAGA |
| NKG2A | TTG CTG GCC TGT ACT TCG A | CCA AAC CAT TCA TTG TCA CCC |
| NKG2D | CTGGTGAAGTCATATCATTGGATGG | GCTCGAGGCATAGAGTGCACAG |
| NKp44 | TACACCCACTGCTACTGCTGCTG | CACTTTGAAGTACCTGAGCCTTGGA |
| NKp46 | TAACCACAGAGACGGGACTCCA | TGCTGAGCCAGTCTTCAACCA |
| PD-1 | CCAGGATGGTTCTTAGACTCCC | TTTAGCACGAAGCTCTCCGAT |
| TIM-3 | TCCAAGGATGCTTACCACCAG | GCCAATGTGGATATTTGTGTTAGATT |
| LAG-3 | GCGGGGACTTCTCGCTATG | GGCTCTGAGAGATCCTGGGG |
| β-ACTIN | AGAGCTACGAGCTGCCTGAC | AGCACTGTGTTGGCGTACAG |
